# Supplementary material for: Estimating the Effect of Intimate Partner Violence on Women’s Use of Contraception: A Systematic Review and Meta-Analysis
Source: PubMed Central journal article supplement (PMC4334227; doi:10.1371/journal.pone.0118234), 2015-02-18
Supplement: pone.0118234.s002.pdf [file pone.0118234.s002.pdf]

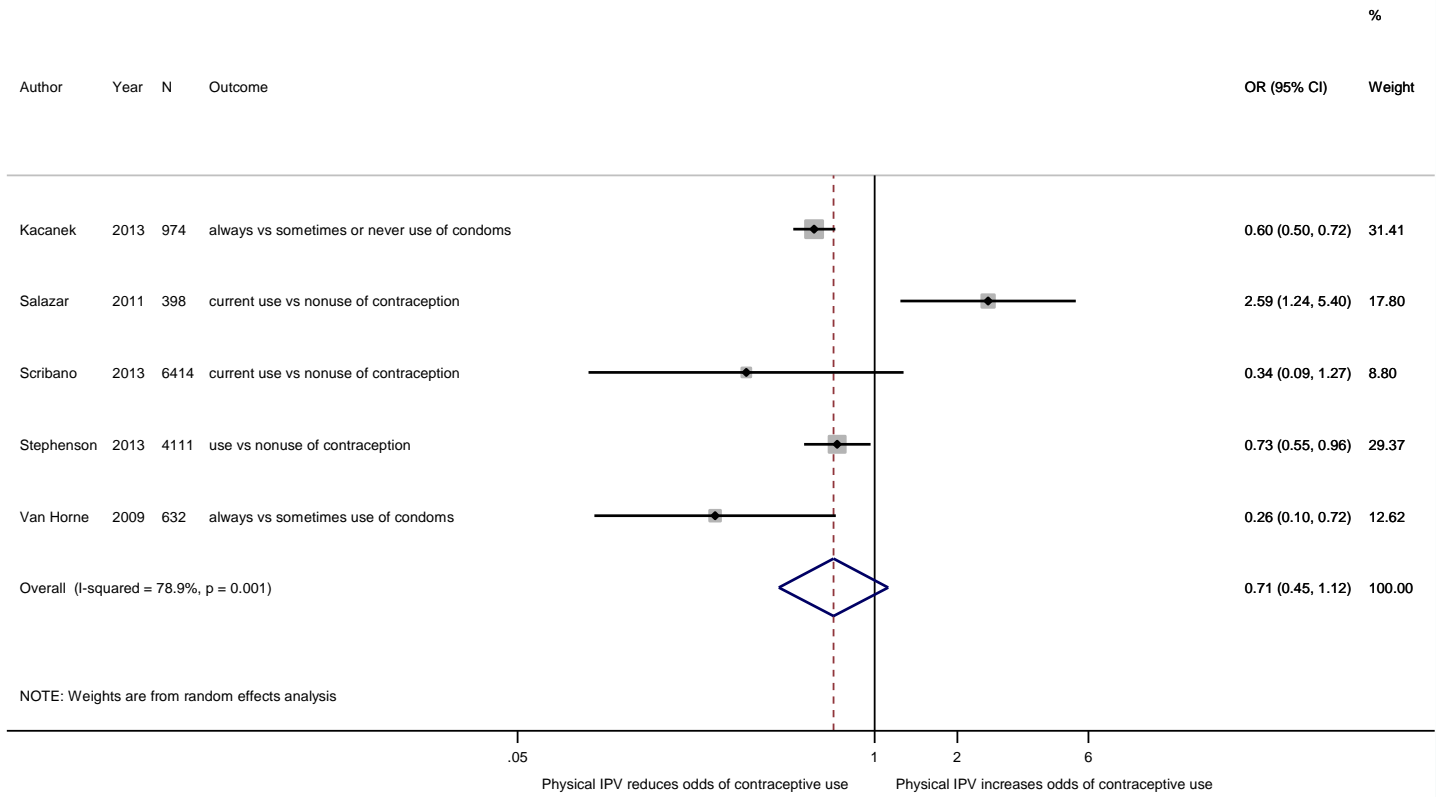

**Figure S2. Meta-analysis of the association between physical partner violence and contraceptive use.** Estimated effect measures from the Kacanek and Van Horne studies have been inverted to present estimates of contraceptive use rather than non-use.
