# Supplementary material for: Estimating the Effect of Intimate Partner Violence on Women’s Use of Contraception: A Systematic Review and Meta-Analysis
Source: PubMed Central journal article supplement (PMC4334227; doi:10.1371/journal.pone.0118234), 2015-02-18
Supplement: pone.0118234.s008.pdf [file pone.0118234.s008.pdf]

Appendix Table S2. List of articles excluded after full text review with reasons for exclusion

|    | <b>Article</b>                                                                                                                                                                                                                                    | <b>Reason for exclusion</b>                             |
|----|---------------------------------------------------------------------------------------------------------------------------------------------------------------------------------------------------------------------------------------------------|---------------------------------------------------------|
| 1. | Ackard DM, Eisenberg ME, Neumark-Sztainer D (2007) Long-term impact of adolescent dating violence on the behavioral and psychological health of male and female youth. <i>The Journal of pediatrics</i> 151: 476-481.                             | no measure of contraceptive use                         |
| 2. | Ackerson LK, Subramanian S (2009) Intimate partner violence and death among infants and children in India. <i>Pediatrics</i> 124: e878-e889.                                                                                                      | no longitudinal measure of IPV or contraceptive outcome |
| 3. | Agurcia CA, Rickert VI, Berenson AB, Volk RJ, Wiemann CM (2001) The behavioral risks and life circumstances of adolescent mothers involved with older adult partners. <i>Archives of Pediatrics and Adolescent Medicine</i> 155: 822-830.         | no measure of contraceptive use                         |
| 4. | Ahmed S, Koenig MA, Stephenson R Effects of domestic violence on perinatal and early-childhood mortality: evidence from north India. <i>Am J Public Health</i> 96: 1423-1428.                                                                     | no longitudinal measure of IPV or contraceptive outcome |
| 5. | Alhusen JL, Lucea MB, Bullock L, Sharps P Intimate partner violence, substance use, and adverse neonatal outcomes among urban women. <i>Journal of Pediatrics</i> 163: 471-476.                                                                   | no longitudinal measure of IPV or contraceptive outcome |
| 6. | Alizadeh M, Samadirad B, Ravanshad Y, Khamenian Z, Azarfar A (2013) A case control study of married women under the violence during pregnancy in Tabriz. [Persian]. <i>Iranian Journal of Obstetrics, Gynecology and Infertility</i> 15: e8-Pe13. | no measure of contraceptive use                         |

Appendix Table S2. List of articles excluded after full text review with reasons for exclusion

|     |                                                                                                                                                                                                                                                                               |                                                                          |
|-----|-------------------------------------------------------------------------------------------------------------------------------------------------------------------------------------------------------------------------------------------------------------------------------|--------------------------------------------------------------------------|
| 7.  | Allsworth JE, Secura GM, Zhao QH, Madden T, Peipert JF (2013) The impact of emotional, physical, and sexual abuse on contraceptive method selection and discontinuation. <i>American Journal of Public Health</i> 103: 1857-1864.                                             | Violence measure not limited to intimate partners or no violence measure |
| 8.  | Asling-Monemi K, Naved RT, Persson LA (2008) Violence against women and the risk of under-five mortality: analysis of community-based data from rural Bangladesh. <i>Acta Paediatrica</i> 97: 226-232.                                                                        | no measure of contraceptive use                                          |
| 9.  | Asling-Monemi K, Peña R, Ellsberg MC, Persson L (2003) Violence against women increases the risk of infant and child mortality: a case-referent study in Nicaragua. <i>Bulletin of the World Health Organization</i> 81: 10-16.                                               | no measure of contraceptive use                                          |
| 10. | Audi CAF, Correa AMS, Latorre MD, Santiago SM (2008) The association between domestic violence during pregnancy and low birth weight or prematurity. [Portuguese, English]: <i>Jornal de Pediatria</i> . 84 (1) (pp 60-67), 2008. Date of Publication: January-February 2008. | no measure of contraceptive use                                          |
| 11. | Audi CAF, Segall-Correa AM, Santiago SM, Andrade MdGG, Perez-Escamila R (2008) Violence against pregnant women: prevalence and associated factors. <i>Revista de Saude Publica</i> 42: 877-885.                                                                               | no measure of contraceptive use                                          |
| 12. | Baumgartner JN, Waszak Geary C, Tucker H, Wedderburn M (2009) The influence of early sexual debut and sexual violence on adolescent pregnancy: a matched case-control study in Jamaica. <i>International perspectives on sexual &amp; reproductive health</i> 35: 21-28.      | Violence measure not limited to intimate partners or no violence measure |
| 13. | Berenson AB, Wiemann CM, Rowe TF, Rickert VI (1997) Inadequate weight gain among pregnant adolescents: risk factors and relationship to infant birth weight. <i>American Journal of Obstetrics &amp; Gynecology</i> 176: 1220-1224; discussion 1224-1227.                     | Violence measure not limited to intimate partners or no violence measure |

Appendix Table S2. List of articles excluded after full text review with reasons for exclusion

|     |                                                                                                                                                                                                                                   |                                                         |
|-----|-----------------------------------------------------------------------------------------------------------------------------------------------------------------------------------------------------------------------------------|---------------------------------------------------------|
|     |                                                                                                                                                                                                                                   |                                                         |
| 14. | Berenson AB, Wiemann CM, Wilkinson GS, Jones WA, Anderson GD (1994) Perinatal morbidity associated with violence experienced by pregnant women. American Journal of Obstetrics & Gynecology 170: 1760-1766; discussion 1766-1769. | no measure of contraceptive use                         |
| 15. | Binka FN, Maude GH, Gyapong TM, Ross DA, Smith PG (1995) Risk factors for child mortality in Northern Ghana: A case-control study: International Journal of Epidemiology. 24 (1) (pp 127-135), 1995. Date of Publication: 1995.   | no measure of contraceptive use                         |
| 16. | Bloom T, Curry MA, Durham L (2007) Abuse and psychological stress as factors in high utilization of medical services during pregnancy. Issues in Mental Health Nursing 28: 849-866.                                               | no measure of contraceptive use                         |
| 17. | Born A (2012) Relationship violence and teenage parents. Journal of Infant, Child & Adolescent Psychotherapy 11: 368-375.                                                                                                         | no longitudinal measure of IPV or contraceptive outcome |
| 18. | Boufettal H, Majdi F, Belhouss A, Mahdaoui S, Noun M, et al. (2012) Domestic violence during pregnancy. [French]: Revue de Medecine Legale. 3 (2) (pp 72-78), 2012. Date of Publication: May 2012.                                | no measure of contraceptive use                         |
| 19. | Bronfman MN (1995) Multimortalidad infantil y familia: dinámica, estructura y riesgo diferenciado. Infant multimortality and family: dynamics, structure and differentiated risk. Perinatol Reprod Hum 9: 11-28.                  | no measure of contraceptive use                         |

Appendix Table S2. List of articles excluded after full text review with reasons for exclusion

|     |                                                                                                                                                                                                                                                                                 |                                                         |
|-----|---------------------------------------------------------------------------------------------------------------------------------------------------------------------------------------------------------------------------------------------------------------------------------|---------------------------------------------------------|
| 20. | Browne A (1993) Violence against women by male partners: Prevalence, outcomes, and policy implications. <i>American Psychologist</i> 48: 1077.                                                                                                                                  | no longitudinal measure of IPV or contraceptive outcome |
| 21. | Buard V, Bergh Rvd, Tayler-Smith K, Godia P, Sobry A, et al. (2013) Characteristics, medical management and outcomes of survivors of sexual gender-based violence, Nairobi, Kenya. <i>Public Health Action</i> 3: 109-112.                                                      | no longitudinal measure of IPV or contraceptive outcome |
| 22. | Budde MP, De Lange TE, Dekker GA, Chan A, Nguyen AMT (2007) Risk factors for placental abruption in a socio-economically disadvantaged region: <i>Journal of Maternal-Fetal and Neonatal Medicine</i> . 20 (9) (pp 687-693), 2007. Date of Publication: 2007.                   | no measure of contraceptive use                         |
| 23. | Calandra N, Vázquez S, Berner E, Corral A, Bianculli C (1996) Embarazo adolescente. Adolescent pregnancy. <i>Rev Soc Argent Ginecol Infanto Juvenil</i> 3: 35-46.                                                                                                               | no longitudinal measure of IPV or contraceptive outcome |
| 24. | Campbell J, Torres S, Ryan J, King C, Campbell DW, et al. (1999) Physical and nonphysical partner abuse and other risk factors for low birth weight among full term and preterm babies: a multiethnic case-control study. <i>American Journal of Epidemiology</i> 150: 714-726. | no longitudinal measure of IPV or contraceptive outcome |
| 25. | Campbell JC, Pugh LC, Campbell D, Visscher M (1995) The influence of abuse on pregnancy intention. <i>Womens Health Issues</i> 5: 214-223.                                                                                                                                      | no measure of contraceptive use                         |
| 26. | Campbell JC, Soeken KL (1999) Forced Sex and Intimate Partner Violence Effects on Women's Risk and Women's Health. <i>Violence Against Women</i> 5: 1017-1035.                                                                                                                  | no longitudinal measure of IPV or contraceptive outcome |

Appendix Table S2. List of articles excluded after full text review with reasons for exclusion

|     |                                                                                                                                                                                                                                                         |                                                           |
|-----|---------------------------------------------------------------------------------------------------------------------------------------------------------------------------------------------------------------------------------------------------------|-----------------------------------------------------------|
| 27. | Chan RL, Martin SL (2009) Physical and sexual violence and subsequent contraception use among reproductive aged women. <i>Contraception</i> 80: 276-281.                                                                                                | no longitudinal measure of IPV or contraceptive outcome   |
| 28. | Chapagain M (2005) Masculine interest behind high prevalence of female contraceptive methods in rural Nepal. <i>Australian Journal of Rural Health</i> 13: 35-42.                                                                                       | no longitudinal measure of IPV or contraceptive outcome   |
| 29. | Chowdhary N, Patel V (2008) The effect of spousal violence on women's health: findings from the Stree Arogya Shodh in Goa, India. <i>Journal of postgraduate medicine</i> 54: 306.                                                                      | no measure of contraceptive use                           |
| 30. | Christofides NJ (2013) Adolescent pregnancy: Risk factors and consequences -- a longitudinal study in the Eastern Cape, South Africa. <i>Dissertation Abstracts International: Section B: The Sciences and Engineering</i> 73: No Pagination Specified. | Commentary, conference abstract, unpublished dissertation |
| 31. | Clark CJ, Silverman J, Khalaf IA, Ra'ad BA, Al Sha'ar ZA, et al. (2008) Intimate partner violence and interference with women's efforts to avoid pregnancy in Jordan. <i>Stud Fam Plann</i> 39: 123-132.                                                | no longitudinal measure of IPV or contraceptive outcome   |
| 32. | Clark LE, Allen RH, Goyal V, Raker C, Gottlieb AS (2013) Reproductive coercion and co-occurring intimate partner violence in obstetrics and gynecology patients. <i>American Journal of Obstetrics &amp; Gynecology</i> .                               | no longitudinal measure of IPV or contraceptive outcome   |
| 33. | Coker AL, Sanderson M, Dong BL (2004) Partner violence during pregnancy and risk of adverse pregnancy outcomes. <i>Paediatric and Perinatal Epidemiology</i> 18: 260-269.                                                                               | no measure of contraceptive use                           |

Appendix Table S2. List of articles excluded after full text review with reasons for exclusion

|     |                                                                                                                                                                                                                                                                                        |                                                           |
|-----|----------------------------------------------------------------------------------------------------------------------------------------------------------------------------------------------------------------------------------------------------------------------------------------|-----------------------------------------------------------|
| 34. | Coker AI, et al. (2000) Intimate partner violence and cervical neoplasia. <i>Journal of women's health &amp; gender-based medicine</i> 9: 1015-1023.                                                                                                                                   | no longitudinal measure of IPV or contraceptive outcome   |
| 35. | Connolly AM, Katz VL, Bash KL, McMahon MJ, Hansen WF (1997) Trauma and pregnancy. <i>American Journal of Perinatology</i> 14: 331-336.                                                                                                                                                 | no measure of contraceptive use                           |
| 36. | Cottingham J, Garcia-Moreno C, Reis C (2008) Sexual and reproductive health in conflict areas: The imperative to address violence against women: <i>BJOG: An International Journal of Obstetrics and Gynaecology</i> . 115 (3) (pp 301-303), 2008. Date of Publication: February 2008. | no longitudinal measure of IPV or contraceptive outcome   |
| 37. | Covington DL, Hage M, Hall T, Mathis M (2001) Preterm delivery and the severity of violence during pregnancy: <i>Journal of Reproductive Medicine for the Obstetrician and Gynecologist</i> . 46 (12) (pp 1031-1039), 2001. Date of Publication: 2001.                                 | no measure of contraceptive use                           |
| 38. | Covington DL, Justason BJ, Wright LN (2001) Severity, manifestations, and consequences of violence among pregnant adolescents: <i>Journal of Adolescent Health</i> . 28 (1) (pp 55-61), 2001. Date of Publication: 2001.                                                               | no measure of contraceptive use                           |
| 39. | Cox JE, Engelhart T, Snyder A, Forbes P, Arandia P, et al. (2012) Impact of domestic violence, relationships & contraceptive use on rapid repeat pregnancy in teen mothers. (Impact of Trauma on Teens: Building the Safety Net.). <i>Journal of Adolescent Health</i> 50: S78-S79.    | Commentary, conference abstract, unpublished dissertation |
| 40. | Cripe SM, Sanchez SE, Perales MT, Lam N, Garcia P (2008) Association of intimate partner physical and sexual violence with unintended pregnancy among pregnant women in Peru. <i>International Journal of Gynecology and Obstetrics</i> 100: 104-108.                                  | no longitudinal measure of IPV or contraceptive outcome   |

Appendix Table S2. List of articles excluded after full text review with reasons for exclusion

|     |                                                                                                                                                                                                                                     |                                                                          |
|-----|-------------------------------------------------------------------------------------------------------------------------------------------------------------------------------------------------------------------------------------|--------------------------------------------------------------------------|
| 41. | Curry MA, Doyle BA, Gilhooley J (1998) Abuse among pregnant adolescents: differences by developmental age. American Journal of Maternal Child Nursing 23: 144-150.                                                                  | no measure of contraceptive use                                          |
| 42. | Curry MA, Perrin N, Wall E (1998) Effects of abuse on maternal complications and birth weight in adult and adolescent women. Obstetrics & Gynecology 92: 530-534.                                                                   | Violence measure not limited to intimate partners or no violence measure |
| 43. | D'Angelo DV, Gilbert BC, RoCHAT RW, Santelli JS, Herold JM (2004) Differences between mistimed and unwanted pregnancies among women who have live births. Perspectives on Sexual & Reproductive Health 36: 192-197.                 | no longitudinal measure of IPV or contraceptive outcome                  |
| 44. | Dalal K, Andrews J, Dawad S (2011) CONTRACEPTION USE AND ASSOCIATIONS WITH INTIMATE PARTNER VIOLENCE AMONG WOMEN IN BANGLADESH. Journal of Biosocial Science: 1-12.                                                                 | no longitudinal measure of IPV or contraceptive outcome                  |
| 45. | Dallas CM (2013) Rapid repeat pregnancy among unmarried, African American adolescent parent couples. Western Journal of Nursing Research 35: 177-192.                                                                               | no longitudinal measure of IPV or contraceptive outcome                  |
| 46. | Debnath A, Roy N, Mazumder N (2013) Modern contraceptive behaviour of Indian women: Is spousal violence a constraint? International Journal of Sociology and Social Policy 33: 426-436.                                             | no longitudinal measure of IPV or contraceptive outcome                  |
| 47. | Deyessa N, Berhane Y, Emmelin M, Ellsberg MC, Kullgren G (2010) Joint effect of maternal depression and intimate partner violence on increased risk of child death in rural Ethiopia. Archives of Disease in Childhood 95: 771-775. | no measure of contraceptive use                                          |

Appendix Table S2. List of articles excluded after full text review with reasons for exclusion

|     |                                                                                                                                                                                                                                                                                                                                                                  |                                                         |
|-----|------------------------------------------------------------------------------------------------------------------------------------------------------------------------------------------------------------------------------------------------------------------------------------------------------------------------------------------------------------------|---------------------------------------------------------|
| 48. | Dietz PM, Gazmaranian JA, Goodwin MM, Bruce FC, et al. (1997) Delayed entry into prenatal care: effect of physical violence. <i>Obstetrics and Gynecology</i> 90: 221-224.                                                                                                                                                                                       | no longitudinal measure of IPV or contraceptive outcome |
| 49. | 50. Dye TD, Tollivert NJ, Lee RV, Kenney CJ (1995) Violence, pregnancy and birth outcome in Appalachia. <i>Paediatric and Perinatal Epidemiology</i> 9: 35-47.                                                                                                                                                                                                   | no measure of contraceptive use                         |
| 50. | Eaton A (2008) Potential risk factors for HIV transmission in heterosexual HIV discordant couples: Intimate partner violence, antiretroviral therapies and concurrent sexual partners. <i>Dissertation Abstracts International: Section B: The Sciences and Engineering</i> 68: 5110.                                                                            | Unpublished dissertation                                |
| 51. | Ministerio de Salud Pública de Ecuador, Centro de Estudios de Población y Desarrollo, Codenpe, Unfpa, Naciones Unidas. (2006) Foro Permanente para las Cuestiones I Situación de salud de los pueblos indígenas en el Ecuador: encuesta demográfica y de salud materna e infantil-ENDEMAIN. Situation of health of the indigenous towns in the Ecuador: 112-112. | no measure of contraceptive use                         |
| 52. | Edirne T, Can M, Kulusari A, Yildizhan R, Adali E, et al. Trends, characteristics, and outcomes of adolescent pregnancy in eastern Turkey. <i>International Journal of Gynaecology &amp; Obstetrics</i> 110: 105-108.                                                                                                                                            | no longitudinal measure of IPV or contraceptive outcome |
| 53. | El Kady D, Gilbert WM, Xing G, Smith LH (2005) Maternal and neonatal outcomes of assaults during pregnancy. <i>Obstetrics and Gynecology</i> 105: 357-363.                                                                                                                                                                                                       | no measure of contraceptive use                         |
| 54. | Escribà-Agüir V, Romito P, Scrimin F, Molzan Turan J Are there differences in the impact of partner violence on reproductive health between postpartum women and women who had an elective abortion? <i>Journal of Urban Health</i> 89: 861-871.                                                                                                                 | no longitudinal measure of IPV or contraceptive outcome |



Appendix Table S2. List of articles excluded after full text review with reasons for exclusion

|     |                                                                                                                                                                                                                                                                                 |                                                         |
|-----|---------------------------------------------------------------------------------------------------------------------------------------------------------------------------------------------------------------------------------------------------------------------------------|---------------------------------------------------------|
|     |                                                                                                                                                                                                                                                                                 |                                                         |
| 55. | Fernandez FM, Krueger PM (1999) Domestic violence: effect on pregnancy outcome. Journal of the American Osteopathic Association 99: 254-256.                                                                                                                                    | no measure of contraceptive use                         |
| 56. | Fonseca SC, Coutinho ESF (2010) Risk factors for fetal mortality in a public maternity hospital in Rio de Janeiro, Brazil: a case-control study. [Portuguese]. Cadernos de Saude Publica 26: 240-252.                                                                           | no measure of contraceptive use                         |
| 57. | Fontenot HB, Fantasia HC (2011) Do women in abusive relationships have contraceptive control? Nursing for Women's Health 15: 239-243.                                                                                                                                           | no longitudinal measure of IPV or contraceptive outcome |
| 58. | Fox-Bartels T (2008) Intimate partner violence in pregnancy. On the Edge 14: 7p.                                                                                                                                                                                                | no longitudinal measure of IPV or contraceptive outcome |
| 59. | Fried LE, Cabral H, Amaro H, Aschengrau A (2008) Lifetime and During Pregnancy Experience of Violence and the Risk of Low Birth Weight and Preterm Birth: Journal of Midwifery and Women's Health. 53 (6) (pp 522-528), 2008. Date of Publication: November 2008/December 2008. | no measure of contraceptive use                         |
| 60. | Ganatra BR, Coyaji KJ, Rao VN (1998) Too far, too little, too late: a community-based case-control study of maternal mortality in rural west Maharashtra, India. Bulletin of the World Health Organization 76: 591-598.                                                         | no measure of contraceptive use                         |

Appendix Table S2. List of articles excluded after full text review with reasons for exclusion

|     |                                                                                                                                                                                                                                          |                                                         |
|-----|------------------------------------------------------------------------------------------------------------------------------------------------------------------------------------------------------------------------------------------|---------------------------------------------------------|
| 61. | Ganjiwale J (2012) Current health status of women in India - issues and challenges. Healthline, Journal of Indian Association of Preventive and Social Medicine 3: 60-63.                                                                | no longitudinal measure of IPV or contraceptive outcome |
| 62. | Gao W, Paterson J, Carter S, Lusitini L (2007) Intimate partner violence and unplanned pregnancy in the Pacific Islands Families Study. International Journal of Gynaecology & Obstetrics 100: 109-115.                                  | no longitudinal measure of IPV or contraceptive outcome |
| 63. | 66. Garoma S, Fantahun M, Worku A (2012) Maternal intimate partner violence victimization and under-five children mortality in Western Ethiopia: a case-control study. Journal of Tropical Pediatrics 58: 467-474.                       | no measure of contraceptive use                         |
| 64. | Gavin AR, Lindhorst T, Lohr MJ (2011) The prevalence and correlates of depressive symptoms among adolescent mothers: results from a 17-year longitudinal study. Women Health 51: 525-545.                                                | no measure of contraceptive use                         |
| 65. | Gazmararian JA, Adams MM, Saltzman LE, Johnson CH, Bruce FC, et al. (1995) The relationship between pregnancy intendedness and physical violence in mothers of newborns. The PRAMS Working Group. Obstetrics & Gynecology 85: 1031-1038. | no longitudinal measure of IPV or contraceptive outcome |
| 66. | Ge E, Mitra N, Wan F, Chavkin DE, Long JA (2009) Power over parity: intimate partner violence and issues of fertility control. American Journal of Obstetrics & Gynecology 201: 148.e141-147.                                            | no longitudinal measure of IPV or contraceptive outcome |
| 67. | Gessesew A, Mesfin M (2004) Rape and related health problems in Adigrat Zonal Hospital, Tigray Region, Ethiopia. Ethiopian Journal of Health Development 18: 140-144.                                                                    | no measure of contraceptive use                         |

Appendix Table S2. List of articles excluded after full text review with reasons for exclusion

|     |                                                                                                                                                                                                                                                                                                                                                 |                                                                          |
|-----|-------------------------------------------------------------------------------------------------------------------------------------------------------------------------------------------------------------------------------------------------------------------------------------------------------------------------------------------------|--------------------------------------------------------------------------|
| 68. | Gielen AC, O'Campo PJ, Faden RR, Kass NE, Xue X (1994) Interpersonal conflict and physical violence during the childbearing year. <i>Social Science &amp; Medicine</i> 39: 781-787.                                                                                                                                                             | no measure of contraceptive use                                          |
| 69. | Goodwin MM, Gazmararian JA, Johnson CH, Gilbert BC, Saltzman LE (2000) Pregnancy intendedness and physical abuse around the time of pregnancy: findings from the pregnancy risk assessment monitoring system, 1996-1997. PRAMS Working Group. <i>Pregnancy Risk Assessment Monitoring System. Maternal &amp; Child Health Journal</i> 4: 85-92. | no longitudinal measure of IPV or contraceptive outcome                  |
| 70. | Grimstad H, Schei B, Backe B, Jacobsen G (1997) Physical abuse and low birthweight: a case-control study. <i>British Journal of Obstetrics &amp; Gynaecology</i> 104: 1281-1287.                                                                                                                                                                | no measure of contraceptive use                                          |
| 71. | Gutierrez SE, Barr A (2003) The relationship between attitudes toward pregnancy and contraception use among drug users. <i>Journal of Substance Abuse Treatment</i> 24: 19-29.                                                                                                                                                                  | Violence measure not limited to intimate partners or no violence measure |
| 72. | Hamburger ME, Moore J, Koenig LJ, Vlahov D, et al. (2004) Persistence of inconsistent condom use: relation to abuse history and HIV serostatus. <i>AIDS and Behavior</i> 8: 333-344.                                                                                                                                                            | Violence measure not limited to intimate partners or no violence measure |
| 73. | Harrykisson SD, Rickert VI, Wiemann CM (2002) Prevalence and patterns of intimate partner violence among adolescent mothers during the postpartum period. <i>Archives of Pediatrics &amp; Adolescent Medicine</i> 156: 325-330.                                                                                                                 | no measure of contraceptive use                                          |
| 74. | Holmes MM, Resnick HS, Kilpatrick DG, Best CL, Moore JG, et al. (1996) Rape-related pregnancy: Estimates and descriptive characteristics from a national sample of women: <i>American Journal of Obstetrics and Gynecology</i> . 175 (2) (pp 320-325), 1996. Date of Publication: 1996.                                                         | Violence measure not limited to intimate partners or no violence measure |

Appendix Table S2. List of articles excluded after full text review with reasons for exclusion

|     |                                                                                                                                                                                                                                                    |                                                         |
|-----|----------------------------------------------------------------------------------------------------------------------------------------------------------------------------------------------------------------------------------------------------|---------------------------------------------------------|
|     |                                                                                                                                                                                                                                                    |                                                         |
| 75. | Huth-Bocks AC, Levendosky AA, Bogat GA (2002) The effects of domestic violence during pregnancy on maternal and infant health: Violence and Victims. 17 (2) (pp 169-185), 2002. Date of Publication: 2002.                                         | no measure of contraceptive use                         |
| 76. | Jacoby M, Gorenflo D, Wunderlich C, Eyler A (1999) Rapid repeat pregnancy and experiences of interpersonal violence among low-income adolescents. American Journal of Preventive Medicine 16: 318-321.                                             | no measure of contraceptive use                         |
| 77. | Jasinski JL (2001) Pregnancy and violence against women: An analysis of longitudinal data. Journal of Interpersonal Violence 16: 712-733.                                                                                                          | no measure of contraceptive use                         |
| 78. | Jejeebhoy SJ (1998) Associations between wife-beating and fetal and infant death: impressions from a survey in rural India. Stud Fam Plann 29: 300-308.                                                                                            | no longitudinal measure of IPV or contraceptive outcome |
| 79. | Jewkes R, Vundule C, Maforah F, Jordaan E (2001) Relationship dynamics and teenage pregnancy in South Africa. Social Science & Medicine 52: 733-744.                                                                                               | no measure of contraceptive use                         |
| 80. | Johnson PJ, Hellerstedt WL, Pirie PL (2002) Abuse history and nonoptimal prenatal weight gain. Public Health Reports 117: 148-156.                                                                                                                 | no measure of contraceptive use                         |
| 81. | Jonsson U, Bohman H, Hjern A, von Knorring L, Paaren A, et al. (2011) Intimate relationships and childbearing after adolescent depression: a population-based 15 year follow-up study. Social Psychiatry and Psychiatric Epidemiology 46: 711-721. | no longitudinal measure of IPV or contraceptive outcome |

Appendix Table S2. List of articles excluded after full text review with reasons for exclusion

|     |                                                                                                                                                                                                                                                                                       |                                 |
|-----|---------------------------------------------------------------------------------------------------------------------------------------------------------------------------------------------------------------------------------------------------------------------------------------|---------------------------------|
|     |                                                                                                                                                                                                                                                                                       |                                 |
| 82. | Kaye DK, Mirembe FM, Bantebya G, Johansson A, Ekstrom AM (2006) Domestic violence as risk factor for unwanted pregnancy and induced abortion in Mulago Hospital, Kampala, Uganda. Tropical Medicine & International Health 11: 90-101.                                                | no measure of contraceptive use |
| 83. | Kaye DK, Mirembe FM, Bantebya G, Johansson A, Ekstrom AM (2006) Domestic violence during pregnancy and risk of low birthweight and maternal complications: a prospective cohort study at Mulago Hospital, Uganda. Tropical medicine & international health : TM & IH 11: 1576-1584.   | no measure of contraceptive use |
| 84. | Kearney MH, Munro BH, Kelly U, Hawkins JW (2004) Health behaviors as mediators for the effect of partner abuse on infant birth weight. Nursing research 53.                                                                                                                           | no measure of contraceptive use |
| 85. | Kearney MH, Haggerty LA, Munro BH, Hawkins JW (2003) Birth Outcomes and Maternal Morbidity in Abused Pregnant Women With Public Versus Private Health Insurance. Journal of Nursing Scholarship 35: 345-349.                                                                          | no measure of contraceptive use |
| 86. | Kiely M, El-Mohandes AA, Gantz MG, Chowdhury D, Thornberry JS, et al. (2011) Understanding the association of biomedical, psychosocial and behavioral risks with adverse pregnancy outcomes among African-Americans in Washington, DC. Maternal and Child Health Journal 15: S85-S95. | no measure of contraceptive use |

Appendix Table S2. List of articles excluded after full text review with reasons for exclusion

|     |                                                                                                                                                                                                                                                                                                                            |                                                                          |
|-----|----------------------------------------------------------------------------------------------------------------------------------------------------------------------------------------------------------------------------------------------------------------------------------------------------------------------------|--------------------------------------------------------------------------|
| 87. | Kildea S, Stapleton H, Murphy R, Kosiak M, Gibbons K (2013) The maternal and neonatal outcomes for an urban Indigenous population compared with their non-Indigenous counterparts and a trend analysis over four triennia: BMC Pregnancy and Childbirth. 13 , 2013. Article Number: 167. Date of Publication: 30 Aug 2013. | no longitudinal measure of IPV or contraceptive outcome                  |
| 88. | Kleijer ME, Dekker GA, Heard AR (2005) Risk factors for intrauterine growth restriction in a socio-economically disadvantaged region: Journal of Maternal-Fetal and Neonatal Medicine. 18 (1) (pp 23-30), 2005. Date of Publication: July 2005.                                                                            | no measure of contraceptive use                                          |
| 89. | Leeners B, Stiller R, Block E, Gorres G, Rath W (2010) Pregnancy complications in women with childhood sexual abuse experiences. Journal of Psychosomatic Research 69: 503-510.                                                                                                                                            | Violence measure not limited to intimate partners or no violence measure |
| 90. | Lipsky S, et al. (2003) Impact of police-reported intimate partner violence during pregnancy on birth outcomes. Obstetrics and Gynecology 102: 557-564.                                                                                                                                                                    | no measure of contraceptive use                                          |
| 91. | Lutz KF, et al. (2006) Double Binding, Abusive Intimate Partner Relationships, and Pregnancy. The Canadian journal of nursing research. Revue canadienne de recherche en sciences infirmières 38: 118-135.                                                                                                                 | no longitudinal measure of IPV or contraceptive outcome                  |
| 92. | Macy RJ, Martin SL, Kupper LL, Casanueva C, Guo S (2007) Partner violence among women before, during, and after pregnancy: multiple opportunities for intervention. Womens Health Issues 17: 290-299.                                                                                                                      | no measure of contraceptive use                                          |
| 93. | Magill MK, Wilcox R (2007) Adolescent pregnancy and associated risks: not just a result of maternal age. American Family Physician 75: 1310-1311.                                                                                                                                                                          | no longitudinal measure of IPV or contraceptive outcome                  |

Appendix Table S2. List of articles excluded after full text review with reasons for exclusion

|      |                                                                                                                                                                                                                                                             |                                                           |
|------|-------------------------------------------------------------------------------------------------------------------------------------------------------------------------------------------------------------------------------------------------------------|-----------------------------------------------------------|
| 94.  | Maughan B, Lindelow M (1997) Secular change in psychosocial risks: the case of teenage motherhood. <i>Psychol Med</i> 27: 1129-1144.                                                                                                                        | no measure of contraceptive use                           |
| 95.  | Mbassa Menick D, Dassa KS, Kenmogne JB, Abanda Ngon G (2009) Commercial sexual exploitation of minor girls. A multifocal, prospective study in Cameroon. [French]: <i>Medecine Tropicale</i> . 69 (1) (pp 91-96), 2009. Date of Publication: February 2009. | no longitudinal measure of IPV or contraceptive outcome   |
| 96.  | McCleary-Sills JD (2012) Intimate partner violence and women's reproductive agency in Jordan. <i>Dissertation Abstracts International: Section B: The Sciences and Engineering</i> 72: 5922.                                                                | Commentary, conference abstract, unpublished dissertation |
| 97.  | McFarlane J, Campbell JC, Sharps P, Watson K (2002) Abuse during pregnancy and femicide: urgent implications for women's health. <i>Obstetrics &amp; Gynecology</i> 100: 27-36.                                                                             | no measure of contraceptive use                           |
| 98.  | McFarlane J, Parker B, Soeken K (1995) Abuse during pregnancy: frequency, severity, perpetrator, and risk factors of homicide. <i>Public Health Nurs</i> 12: 284-289.                                                                                       | no measure of contraceptive use                           |
| 99.  | McFarlane J, Parker B, Soeken K (1996) Physical abuse, smoking, and substance use during pregnancy: Prevalence, interrelationships, and effects on birth weight. <i>Journal of Obstetric, Gynecologic, &amp; Neonatal Nursing</i> 25: 313-320.              | no measure of contraceptive use                           |
| 100. | McFarlane J, Soeken K (1999) Weight change of infants, age birth to 12 months, born to abused women. <i>Pediatric Nursing</i> 25: 19.                                                                                                                       | no measure of contraceptive use                           |

Appendix Table S2. List of articles excluded after full text review with reasons for exclusion

|      |                                                                                                                                                                                                                                                                 |                                                         |
|------|-----------------------------------------------------------------------------------------------------------------------------------------------------------------------------------------------------------------------------------------------------------------|---------------------------------------------------------|
| 101. | McFarlane J, et al. (1992) Assessing for abuse during pregnancy. Severity and frequency of injuries and associated entry into prenatal care. JAMA : the journal of the American Medical Association 267: 3176-3178.                                             | no measure of contraceptive use                         |
| 102. | McPherson M, Delva J, Cranford J (2007) A longitudinal investigation of intimate partner violence among mothers with mental illness. Psychiatric Services 58: 675-680.                                                                                          | no measure of contraceptive use                         |
| 103. | Miller E, Jordan B, Levenson R, Silverman JG (2010) Reproductive coercion: connecting the dots between partner violence and unintended pregnancy. Contraception 81: 457-459.                                                                                    | no longitudinal measure of IPV or contraceptive outcome |
| 104. | Miller E, McCauley H, Decker M, Tancredi DJ, Levenson R, et al. (2012) Partner violence and care-seeking patterns among female family planning clinic clients. (Impact of Trauma on Teens: Building the Safety Net.). Journal of Adolescent Health 50: S80-S81. | no longitudinal measure of IPV or contraceptive outcome |
| 105. | Moore M (1999) Reproductive health and intimate partner violence. Family Planning Perspectives 31: 302-306.                                                                                                                                                     | no longitudinal measure of IPV or contraceptive outcome |
| 106. | Moraes CL, et al. (2006) Gestational weight gain differentials in the presence of intimate partner violence. International Journal of Gynecology and Obstetrics 95: 254-260.                                                                                    | no measure of contraceptive use                         |
| 107. | Nega A, Yemane B, Alemayehu W (2012) Wealth status, Mid Upper Arm Circumference (MUAC) and antenatal care (ANC) are determinants for low birth weight in Kersa, Ethiopia. PLoS ONE 7.                                                                           | no measure of contraceptive use                         |



Appendix Table S2. List of articles excluded after full text review with reasons for exclusion

|      |                                                                                                                                                                                                                                                                               |                                                                          |
|------|-------------------------------------------------------------------------------------------------------------------------------------------------------------------------------------------------------------------------------------------------------------------------------|--------------------------------------------------------------------------|
| 108. | Nelson DB, Lepore SJ (2013) The role of stress, depression, and violence on unintended pregnancy among young urban women: <i>Journal of Women's Health</i> . 22 (8) (pp 673-680), 2013. Date of Publication: 01 Aug 2013.                                                     | no longitudinal measure of IPV or contraceptive outcome                  |
| 109. | Noell J, Rohde P, Seeley J, Ochs L (2001) Childhood sexual abuse, adolescent sexual coercion and sexually transmitted infection acquisition among homeless female adolescents. <i>Child Abuse &amp; Neglect</i> 25: 137-148.                                                  | Violence measure not limited to intimate partners or no violence measure |
| 110. | Nunes MAA, Camey S, Ferri CP, Manzolli P, Manenti CN, et al. (2011) Violence during pregnancy and newborn outcomes: a cohort study in a disadvantaged population in Brazil. <i>European Journal of Public Health</i> 21: 92-97.                                               | no measure of contraceptive use                                          |
| 111. | Nurul A, Saha SK, Abdur R, Ginneken JKv(2001) The effect of divorce on infant mortality in a remote area of Bangladesh. <i>Journal of Biosocial Science</i> 33: 271-278.                                                                                                      | no measure of contraceptive use                                          |
| 112. | O'Campo P, Gielen AC, Faden RR, Kass N (1994) Verbal abuse and physical violence among a cohort of low-income pregnant women: <i>Women's Health Issues</i> . 4 (1) (pp 29-37), 1994. Date of Publication: 1994.                                                               | no measure of contraceptive use                                          |
| 113. | O'Donnell L, Agronick G, Duran R, Myint U, Stueve A (2009) Intimate partner violence among economically disadvantaged young adult women: Associations with adolescent risk-taking and pregnancy experiences. <i>Perspectives on Sexual and Reproductive Health</i> 41: 84-91. | no measure of contraceptive use                                          |
| 114. | Ordoñez M La situación de salud general y reproductiva de la población rural en Colombia. The situation of general and reproductive health of the rural population in Colombia. <i>Estudio a profundidad de la ENDS-2000</i> : 191-191.                                       | no longitudinal measure of IPV or contraceptive outcome                  |

Appendix Table S2. List of articles excluded after full text review with reasons for exclusion

|      |                                                                                                                                                                                                                                                                                            |                                                         |
|------|--------------------------------------------------------------------------------------------------------------------------------------------------------------------------------------------------------------------------------------------------------------------------------------------|---------------------------------------------------------|
|      |                                                                                                                                                                                                                                                                                            |                                                         |
| 115. | Otsea K (1999) Prioritizing reproductive health for refugees. Initiatives in Reproductive Health Policy 3: 1-3.                                                                                                                                                                            | no longitudinal measure of IPV or contraceptive outcome |
| 116. | Ouattara M, Sen P, Thomson M (1998) Forced marriage, forced sex: the perils of childhood for girls. Gender & Development 6: 27-33.                                                                                                                                                         | no longitudinal measure of IPV or contraceptive outcome |
| 117. | Pak LL, Reece EA, Chan L (1998) Is adverse pregnancy outcome predictable after blunt abdominal trauma? American Journal of Obstetrics & Gynecology 179: 1140-1144.                                                                                                                         | no measure of contraceptive use                         |
| 118. | Pallitto CC, Garcia-Moreno C, Jansen HA, Heise L, Ellsberg M, et al. (2013) Intimate partner violence, abortion, and unintended pregnancy: results from the WHO Multi-country Study on Women's Health and Domestic Violence. International Journal of Gynaecology and Obstetrics 120: 3-9. | no longitudinal measure of IPV or contraceptive outcome |
| 119. | Panaretto K, Lee H, Mitchell M, Larkins S, Manassis V, et al. (2006) Risk factors for preterm, low birth weight and small for gestational age birth in urban Aboriginal and Torres Strait Islander women in Townsville. Australian & New Zealand Journal of Public Health 30: 163-170.     | no measure of contraceptive use                         |
| 120. | Parker B (2002) Childbearing experiences of abused Hispanic women: Journal of midwifery & women's health. 47 (5) (pp 401-402), 2002. Date of Publication: 2002 Sep-Oct.                                                                                                                    | no measure of contraceptive use                         |

Appendix Table S2. List of articles excluded after full text review with reasons for exclusion

|      |                                                                                                                                                                                                                                                           |                                                         |
|------|-----------------------------------------------------------------------------------------------------------------------------------------------------------------------------------------------------------------------------------------------------------|---------------------------------------------------------|
| 121. | Parker B, Chouaf K (2002) Intimate partner violence following pregnancy. Archives of Pediatrics & Adolescent Medicine 156: 313-314.                                                                                                                       | no measure of contraceptive use                         |
| 122. | Parker B, McFarlane J, Soeken K (1994) Abuse during pregnancy: effects on maternal complications and birth weight in adult and teenage women. Obstetrics & Gynecology 84: 323-328.                                                                        | no longitudinal measure of IPV or contraceptive outcome |
| 123. | Parker B, et al (1993) Physical and emotional abuse in pregnancy: a comparison of adult and teenage women. Nursing research 42.                                                                                                                           | no measure of contraceptive use                         |
| 124. | Patel SN (2013) Understanding hiv transmission risk in married hiv serodiscordant couples in Gujarat, India: The Positive Jeevan Saathi Study. Dissertation Abstracts International: Section B: The Sciences and Engineering 74: No Pagination Specified. | no longitudinal measure of IPV or contraceptive outcome |
| 125. | Prosman G-J, Lo Fo Wong SH, Bulte E, Lagro-Janssen ALM (2012) Healthcare utilization by abused women: a case control study. European Journal of General Practice 18: 107-113.                                                                             | no measure of contraceptive use                         |
| 126. | Radhakrishna A, Gringle R, Greenslade F (1997) Adolescent women face triple jeopardy: unwanted pregnancy, HIV / AIDS and unsafe abortion. Women's Health Journal: 53-62.                                                                                  | no longitudinal measure of IPV or contraceptive outcome |
| 127. | Ramashwar S (2009) South African women living in areas with high levels of sexual violence are at risk for HIV, early pregnancy. International perspectives on sexual & reproductive health 35: 211-212.                                                  | no longitudinal measure of IPV or contraceptive outcome |

Appendix Table S2. List of articles excluded after full text review with reasons for exclusion

|      |                                                                                                                                                                                                                                                                                                                    |                                                         |
|------|--------------------------------------------------------------------------------------------------------------------------------------------------------------------------------------------------------------------------------------------------------------------------------------------------------------------|---------------------------------------------------------|
| 128. | Rico E, Fenn B, Abramsky T, Watts C (2011) Associations between maternal experiences of intimate partner violence and child nutrition and mortality: findings from Demographic and Health Surveys in Egypt, Honduras, Kenya, Malawi and Rwanda. <i>Journal of Epidemiology &amp; Community Health</i> 65: 360-367. | no longitudinal measure of IPV or contraceptive outcome |
| 129. | Roberts TA, Klein JD, Fisher S (2003) Longitudinal effect of intimate partner abuse on high-risk behavior among adolescents. <i>Archives of Pediatrics &amp; Adolescent Medicine</i> 157: 875.                                                                                                                     | no measure of contraceptive use                         |
| 130. | Rodrigues T, Rocha L, Barros H (2008) Physical abuse during pregnancy and preterm delivery. <i>American Journal of Obstetrics &amp; Gynecology</i> 198: 171.e171-176.                                                                                                                                              | no measure of contraceptive use                         |
| 131. | Rosenberg J (2003) Abused women's children have an increased risk of dying before age five. <i>International Family Planning Perspectives</i> 29: [4].                                                                                                                                                             | no measure of contraceptive use                         |
| 132. | Salam M, Alim M, Noguchi T (2006) Spousal Abuse Against Women and Its Consequences on Reproductive Health: A Study in the Urban Slums in Bangladesh. <i>Maternal and Child Health Journal</i> 10: 83-94.                                                                                                           | no longitudinal measure of IPV or contraceptive outcome |
| 133. | Salazar M, Valladares E, Öhman A, Högberg U (2009) Ending intimate partner violence after pregnancy: findings from a community-based longitudinal study in Nicaragua. <i>BMC Public Health</i> 9: 350.                                                                                                             | no measure of contraceptive use                         |
| 134. | Sanchez SE, Alva AV, Chang GD, Qiu C, Yanez D, et al. (2013) Risk of spontaneous preterm birth in relation to maternal exposure to intimate partner violence during pregnancy in Peru. <i>Maternal and Child Health Journal</i> 17: 485-492.                                                                       | no measure of contraceptive use                         |

Appendix Table S2. List of articles excluded after full text review with reasons for exclusion

|      |                                                                                                                                                                                                                                                                                           |                                 |
|------|-------------------------------------------------------------------------------------------------------------------------------------------------------------------------------------------------------------------------------------------------------------------------------------------|---------------------------------|
| 135. | Sanchez SE, Qiu CF, Perales MT, Lam N, Garcia P, et al. (2008) Intimate partner violence (IPV) and preeclampsia among Peruvian women. <i>European Journal of Obstetrics &amp; Gynecology and Reproductive Biology</i> 137: 50-55.                                                         | no measure of contraceptive use |
| 136. | Saurel-Cubizolles MJ, Lelong N (2005) [Familial violence during pregnancy]. <i>Journal de Gynecologie, Obstetrique et Biologie de la Reproduction</i> 34: S47-53.                                                                                                                         | no measure of contraceptive use |
| 137. | Shannon K, Csete J (2010) Violence, condom negotiation, and HIV/STI risk among sex workers: <i>JAMA - Journal of the American Medical Association</i> . 304 (5) (pp 573-574), 2010. Date of Publication: 04 Aug 2010.                                                                     | no measure of contraceptive use |
| 138. | Shroff MR, Griffiths PL, Suchindran C, Nagalla B, Vazir S, et al. (2011) Does maternal autonomy influence feeding practices and infant growth in rural India?: <i>Social Science and Medicine</i> . 73 (3) (pp 447-455), 2011. Date of Publication: August 2011.                          | no measure of contraceptive use |
| 139. | Silverman JG, Decker MR, Cheng DM, Wirth K, Niranjana S, et al. (2011) Gender-based disparities in infant and child mortality based on maternal exposure to spousal violence: the heavy burden borne by Indian girls. <i>Archives of Pediatrics &amp; Adolescent Medicine</i> 165: 22-27. | no measure of contraceptive use |
| 140. | Sipsma HL, Magriples U, Divney A, Gordon D, Gabzdyl E, et al. (2013) Breastfeeding behavior among adolescents: initiation, duration, and exclusivity. <i>Journal of Adolescent Health</i> 53: 394-400.                                                                                    | no measure of contraceptive use |
| 141. | Stephenson R, Koenig MA, Ahmed S (2006) Domestic violence and contraceptive adoption in Uttar Pradesh, India. <i>Stud Fam Plann</i> 37: 75-86.                                                                                                                                            | no measure of contraceptive use |

Appendix Table S2. List of articles excluded after full text review with reasons for exclusion

|      |                                                                                                                                                                                                                                    |                                                                          |
|------|------------------------------------------------------------------------------------------------------------------------------------------------------------------------------------------------------------------------------------|--------------------------------------------------------------------------|
| 142. | Stephenson R, Koenig MA, Rajib A, Roy TK (2008) Domestic violence, contraceptive use, and unwanted pregnancy in rural India. <i>Studies in Family Planning</i> 39: 177-186.                                                        | Violence measure not limited to intimate partners or no violence measure |
| 143. | Sun F, Tu X (2011) Effect of domestic violence on women reproductive health. [Chinese]. <i>Journal of International Reproductive Health/Family Planning</i> 30: 338-341.                                                           | no longitudinal measure of IPV or contraceptive outcome                  |
| 144. | Swan H, O'Connell DJ (2012) The impact of intimate partner violence on women's condom negotiation efficacy. <i>J Interpers Violence</i> 27: 775-792.                                                                               | no longitudinal measure of IPV or contraceptive outcome                  |
| 145. | Taft AJ, Watson LF (2007) Termination of pregnancy: associations with partner violence and other factors in a national cohort of young Australian women. <i>Australian &amp; New Zealand Journal of Public Health</i> 31: 135-142. | no measure of contraceptive use                                          |
| 146. | Talley PR (2002) Male violence and stress in pregnancy: Neuroendocrine parameters and length of gestation. <i>Dissertation Abstracts International: Section B: The Sciences and Engineering</i> 63: 2312.                          | no measure of contraceptive use                                          |
| 147. | Tan JCH, Gregor KV (2006) Violence against pregnant women in Northwestern Ontario. <i>Annals of the New York Academy of Sciences</i> 1087: 320-338.                                                                                | no measure of contraceptive use                                          |
| 148. | Taneva D (2009) Undesired pregnancy and desired abortion. [Bulgarian]. <i>Zdravna Politika i Menidzhm'nt / Health Policy and Management</i> 1: 45-48.                                                                              | no longitudinal measure of IPV or contraceptive outcome                  |

Appendix Table S2. List of articles excluded after full text review with reasons for exclusion

|      |                                                                                                                                                                                                                                                                                         |                                                                          |
|------|-----------------------------------------------------------------------------------------------------------------------------------------------------------------------------------------------------------------------------------------------------------------------------------------|--------------------------------------------------------------------------|
| 149. | Tiwari A, Chan KL, Fong D, Leung WC, Brownridge DA, et al. (2008) The impact of psychological abuse by an intimate partner on the mental health of pregnant women. <i>BJOG: An International Journal of Obstetrics &amp; Gynaecology</i> 115: 377-384.                                  | no measure of contraceptive use                                          |
| 150. | Turner AN, Van Damme K, Jamieson DJ, Khan MR, Pettifor AE, et al. (2009) Predictors of adherent use of diaphragms and microbicide gel in a four-arm, randomized pilot study among female sex workers in Madagascar. <i>Sexually Transmitted Diseases</i> 36: 249-257.                   | Violence measure not limited to intimate partners or no violence measure |
| 151. | Uscher-Pines L, Nelson DB (2010) Neighborhood and individual-level violence and unintended pregnancy. <i>Journal of Urban Health: Bulletin of the New York Academy of Medicine</i> 87: 677-687.                                                                                         | no longitudinal measure of IPV or contraceptive outcome                  |
| 152. | Valentine JM, Rodriguez MA, Lapeyrouse LM, Zhang M (2011) Recent intimate partner violence as a prenatal predictor of maternal depression in the first year postpartum among Latinas. <i>Archives of Women's Mental Health</i> 14: 135-143.                                             | no measure of contraceptive use                                          |
| 153. | Valladares E, Ellsberg M, Peña R, Högberg U, Persson L (2002) Physical partner abuse during pregnancy: a risk factor for low birth weight in Nicaragua. <i>Obstetrics &amp; Gynecology</i> 100: 700-705.                                                                                | no measure of contraceptive use                                          |
| 154. | VandeCastle M, Danna J, DeCoster E, Thomas T (1994) Physical violence during the 12 months preceding childbirth - Alaska, Maine, Oklahoma, and West Virginia, 1990-1991: <i>Journal of the American Medical Association</i> . 271 (15) (pp 1152-1153), 1994. Date of Publication: 1994. | no longitudinal measure of IPV or contraceptive outcome                  |
| 155. | Varela ZMdV, Silva RM, Barroso MGT (1998) Dimensões do cotidiano: violência doméstica, saúde da mulher e desempenho no trabalho. <i>Activities of daily living: women's health and domestic violence</i> . 154-154.                                                                     | Commentary, conference abstract, unpublished dissertation                |

Appendix Table S2. List of articles excluded after full text review with reasons for exclusion

|      |                                                                                                                                                                                                                                                                                                                                                    |                                                                          |
|------|----------------------------------------------------------------------------------------------------------------------------------------------------------------------------------------------------------------------------------------------------------------------------------------------------------------------------------------------------|--------------------------------------------------------------------------|
| 156. | Vos T, et al (2006) Measuring the impact of intimate partner violence on the health of women in Victoria, Australia. <i>Bulletin of the World Health Organization</i> 84: 739-744.                                                                                                                                                                 | no measure of contraceptive use                                          |
| 157. | Watson LF, Taft AJ, Lee C (2007) Associations of self-reported violence with age at menarche, first intercourse, and first birth among a national population sample of young Australian women. <i>Womens Health Issues</i> 17: 281-289.                                                                                                            | no measure of contraceptive use                                          |
| 158. | Webster J, Chandler J, Battistutta D (1996) Pregnancy outcomes and health care use: effects of abuse. <i>American Journal of Obstetrics &amp; Gynecology</i> 174: 760-767.                                                                                                                                                                         | no measure of contraceptive use                                          |
| 159. | Wiemann CM, Agurcia CA, Berenson AB, Volk RJ, Rickert VI (2000) Pregnant adolescents: experiences and behaviors associated with physical assault by an intimate partner. <i>Maternal and Child Health Journal</i> 4: 93-101.                                                                                                                       | no measure of contraceptive use                                          |
| 160. | Williams C, McCloskey L (2006) Intimate partner violence and contraceptive use. [Unpublished] 2006. Presented at the Population Association of America, 2006 Annual Meeting, Los Angeles, California, March 30 - April 1, 2006. [21] p. p.                                                                                                         | Commentary, conference abstract, unpublished dissertation                |
| 161. | Witte SS, Batsukh A, Chang M (2010) Sexual risk behaviors, alcohol abuse, and intimate partner violence among sex workers in Mongolia: implications for HIV prevention intervention development. (Special Issue: Global HIV prevention efforts with vulnerable women.). <i>Journal of Prevention and Intervention in the Community</i> 38: 89-103. | Violence measure not limited to intimate partners or no violence measure |



Appendix Table S2. List of articles excluded after full text review with reasons for exclusion

|      |                                                                                                                                                                                                                                |                                                                          |
|------|--------------------------------------------------------------------------------------------------------------------------------------------------------------------------------------------------------------------------------|--------------------------------------------------------------------------|
| 162. | Woods SM, Melville JL, Guo Y, Fan MY, Gavin A (2010) Psychosocial stress during pregnancy: American Journal of Obstetrics and Gynecology. 202 (1) (pp 61.e1-61.e7), 2010. Date of Publication: January 2010.                   | no measure of contraceptive use                                          |
| 163. | Yimin C, Baohua K, Tieyan W, Xuejun H, Huan S, et al. (2001) Case-controlled study on relevant factors of adolescent sexual coercion in China: Contraception. 64 (2) (pp 77-80), 2001. Date of Publication: 2001.              | Violence measure not limited to intimate partners or no violence measure |
| 164. | Yimin C, Shouqing LI, Arzhu QU, Yuke Z, Jianhua W, et al. (2002) Sexual coercion among adolescent women seeking abortion in China: Journal of Adolescent Health. 31 (6) (pp 482-486), 2002. Date of Publication: 01 Dec 2002.  | Violence measure not limited to intimate partners or no violence measure |
| 165. | Zapata L Repercusiones de la violencia basada en el género sobre el embarazo. Repercussions of gender violence upon pregnancy. Rev Obstet Ginecol Venez 66: 21-27.                                                             | no measure of contraceptive use                                          |
| 166. | Zareen N, Majid N, Naqvi S, Saboohi S, Fatima H (2009) Effect of domestic violence on pregnancy outcome: Journal of the College of Physicians and Surgeons Pakistan. 19 (5) (pp 291-296), 2009. Date of Publication: May 2009. | no measure of contraceptive use                                          |
| 167. | Zunaira A, Zafar MI, Zahira B (2007) Impact assessment of wife battering on their reproductive health in rural areas of district Faisalabad. Science International 19: 313-317.                                                | no measure of contraceptive use                                          |
