# Supplementary material for: Estimating the Effect of Intimate Partner Violence on Women’s Use of Contraception: A Systematic Review and Meta-Analysis
Source: PubMed Central journal article supplement (PMC4334227; doi:10.1371/journal.pone.0118234), 2015-02-18
Supplement: pone.0118234.s009.pdf [file pone.0118234.s009.pdf]

**Table S3.** Summary of randomized controlled trials that examine the association between IPV and women contraceptive use.

| Author, year      | Population; country                                                                                                                                                                        | Intervention arm                                                                                                                                                                  | Control arm                                                                                        | Intimate partner                                        | IPV                                                          | Outcome                                                                | OR (95% CI)       | Probability of bias <sup>a</sup> | Qualitative summary of findings                                                                                                    |
|-------------------|--------------------------------------------------------------------------------------------------------------------------------------------------------------------------------------------|-----------------------------------------------------------------------------------------------------------------------------------------------------------------------------------|----------------------------------------------------------------------------------------------------|---------------------------------------------------------|--------------------------------------------------------------|------------------------------------------------------------------------|-------------------|----------------------------------|------------------------------------------------------------------------------------------------------------------------------------|
| KacaneK 2013 [43] | Subset of MIRA trial [71] participants ages 18-49 recruited from clinics. Limited to participants who answered questions on IPV at baseline and 12 month follow-up; South Africa, Zimbabwe | Diaphragm, lubricant gel, and condoms; product adherence and risk reduction counseling; HIV/STI testing and treatment. Women who report IPV referred to available services. N=950 | Condoms; HIV/STI testing and treatment. Women who report IPV referred to available services. N=974 | Person you most often had sex with in the last 3 months | Physical or sexual (any vs no IPV in past year) <sup>b</sup> | Sometimes/never vs always use of condoms in last 3 months <sup>c</sup> | 1.66 (1.39, 1.98) | Low                              | Intervenes on IPV and outcome in intervention arm                                                                                  |
| Jones 2013 [44]   | 239 pregnant women age 18 or over who completed HIV counseling and testing and agreed to participate with their male partner, recruited from 12 antenatal clinics; South Africa            | Group sessions to improve sexual negotiation, conflict resolution, STI/HIV prevention, PMTCT, use of male and female condoms, gender issues                                       | Group health education sessions plus PMTCT                                                         | NR                                                      | NR                                                           | Consistent vs inconsistent condom use 6-8 weeks post baseline          | NR                | NA                               | No relevant effect measure (no measure of condom uptake by IPV status in either study arm). Intervenes on IPV and outcome          |
| Wingood 2006 [39] | Subset of RCT of African-American adolescent girls [72] who reported their boyfriend forced sexual intercourse and reported having vaginal intercourse in past 6 months; USA               | HIV prevention sessions (reduce HIV risk, enhance condom use and communication skills, build healthy relationships). N=73                                                         | General health promotion sessions. N=73                                                            | Boyfriend                                               | Physical or sexual IPV                                       | Consistent condom use in the last month                                | NR                | NA                               | No relevant effect measure (restricted to girls who report baseline IPV, no additional IPV measure). Intervenes on IPV and outcome |

OR, adjusted odds ratio; CI, confidence interval; MIRA, Methods for Improving Reproductive Health in Africa; HIV, human immuno-deficiency virus; STI, sexually transmitted infection; IPV, intimate partner violence; PMTCT, Prevention of maternal to child transmission; NR, Not reported; NA, Not applicable

<sup>a</sup>We do not evaluate bias in the estimate from the Jones and Wingood RCTs because these RCTs did not have an effect estimate relevant to our research question

<sup>b</sup>While the KacaneK study includes a more expansive definition of IPV that includes physical, sexual, emotional violence and fear of violence; we use the estimate that includes physical and sexual IPV for comparability given that no other study includes “fear of violence” as a form of IPV
