# Supplementary material for: Estimating the Effect of Intimate Partner Violence on Women’s Use of Contraception: A Systematic Review and Meta-Analysis
Source: PubMed Central journal article supplement (PMC4334227; doi:10.1371/journal.pone.0118234), 2015-02-18
Supplement: pone.0118234.s012.pdf [file pone.0118234.s012.pdf]

## Methodological Quality Assessment of Observational Studies: Legend

| Cohort                                                                                                                                   |                                                                                                               | Cross-sectional |                                                                | Case-control |                                                                                                                                                           |
|------------------------------------------------------------------------------------------------------------------------------------------|---------------------------------------------------------------------------------------------------------------|-----------------|----------------------------------------------------------------|--------------|-----------------------------------------------------------------------------------------------------------------------------------------------------------|
| <b>External validity (The extent to which the results of the study provide a correct basis for applicability to other circumstances)</b> |                                                                                                               |                 |                                                                |              |                                                                                                                                                           |
| 1                                                                                                                                        | Representativeness of the sample for the target population                                                    | 1               | Representativeness of the sample for the target population     |              |                                                                                                                                                           |
| 2                                                                                                                                        | What percentage of selected individuals agreed to participate? (in baseline cross-sectional where applicable) | 2               | What percentage of selected individuals agreed to participate? | 1            | What percentage of cases and controls selected agreed to participate? (in baseline cross-sectional where applicable)                                      |
| <b>Internal validity (The extent to which systematic error, bias, is minimised in a study)</b>                                           |                                                                                                               |                 |                                                                |              |                                                                                                                                                           |
| <b>Performance Bias (Systematic differences in Measurement of Exposure)</b>                                                              |                                                                                                               |                 |                                                                |              |                                                                                                                                                           |
| 1                                                                                                                                        | How was circumcision status ascertained?                                                                      | 1               | How was circumcision status ascertained?                       | 1            | How was circumcision status ascertained?                                                                                                                  |
|                                                                                                                                          |                                                                                                               | 2               | Were assessors of circumcision status blinded to HIV status?   | 2            | Were assessors of circumcision status blinded to HIV status?                                                                                              |
|                                                                                                                                          |                                                                                                               |                 |                                                                | 3            | Was the same method of ascertainment of circumcision status used for cases and controls?                                                                  |
| <b>Detection Bias (Systematic differences in outcome assessment)</b>                                                                     |                                                                                                               |                 |                                                                |              |                                                                                                                                                           |
| 2                                                                                                                                        | How was HIV status ascertained?                                                                               | 3               | How was HIV status ascertained?                                | 4            | How was HIV status ascertained?                                                                                                                           |
| 3                                                                                                                                        | How was HIV status confirmed?                                                                                 | 4               | How was HIV status confirmed?                                  | 5            | How was HIV status confirmed?                                                                                                                             |
| 4                                                                                                                                        | Were assessors of HIV status blinded to circumcision status?                                                  | 5               | Were assessors of HIV status blinded to circumcision status?   | 6            | Were assessors of HIV status blinded to circumcision status?                                                                                              |
| <b>Attrition bias (Systematic differences in follow-up)</b>                                                                              |                                                                                                               |                 |                                                                |              |                                                                                                                                                           |
| 5                                                                                                                                        | Were both groups followed-up for the same amount of time?                                                     |                 |                                                                |              |                                                                                                                                                           |
| 6                                                                                                                                        | Adequacy of follow-up of cohorts (percentage of participants included in the final analysis)                  | 6               | Percentage of participants included in the final analysis?     | 7            | Percentage of participants included in the final analysis: percentage HIV positive participants (cases)? Percentage HIV negative participants (controls)? |
| <b>Selection Bias / Control of confounding (Systematic differences in comparison groups)</b>                                             |                                                                                                               |                 |                                                                |              |                                                                                                                                                           |
| 7                                                                                                                                        | Demonstration that no person was HIV positive at the start of the study                                       |                 |                                                                | 8            | How were the cases selected?                                                                                                                              |
|                                                                                                                                          |                                                                                                               |                 |                                                                | 9            | How was the control group selected?                                                                                                                       |
